# Supplementary material
Source: Research Square preprint supplement (doi:10.21203/rs.3.rs-9880362/v1)
Supplement: Supplementary file 1 [file 38d03e57e70763cbdf06cf69.docx]

**Phase II Clinical Study of Camrelizumab, a PD-1 Antibody, in Combination with Nab-POF Regimen for Conversion Therapy in Unresectable Locally Advanced or Single-Site Limited Metastatic Gastric Cancer: FDZL-GC 001 Trial**

**Protocol No.: FDZL-PFG**

**Investigator-Initiated Clinical Trial**

Principal Investigators: Weijian Guo , Dazhi Xu

Sponsor: Fudan university shanghai cancer center

***Version No.: 4.1***

***Version Date: 26 Oct 2024***

**Instructions:**

**Subject ID: Two-digit screening number, e.g., 01, 02.......**

**Subject initials in Pinyin: Four letters. For two-character names, the first two letters of each character will be used; for three-character names, the first letter of each character and the second letter of the third character will be used. E.g., Zhang Hong ZHHO, Li Shuming LSMI**

catalogue

[synopsis](#_Toc26605) 4

[1. background](#_Toc5987) 9

[2. objectives](#_Toc16212) 11

[3. study design](#_Toc32502) 11

[4. Study population](#_Toc19041) 12

[4.1 Inclusion criteria](#_Toc30488) 13

[4.2 Exclusion criteria](#_Toc31291) 13

[4.3 Withdrawlal criteria](#_Toc29288) 15

[4.4 removal criteria](#_Toc27856) 15

[5. Dosage and administration](#_Toc24000) 15

[6. study flow](#_Toc4010) 15

[7. Compliance](#_Toc15408) 16

[8. associated diseases and concomitant medications](#_Toc16002) 17

[9. study evaluation](#_Toc29645) 17

[9.1 Study Procures](#_Toc25426) 17

[9.1.1 Screening period/baseline (-2W-0)](#_Toc23041) 17

[9.1.2, Treatment Visits](#_Toc3052) 17

[9.1.3 End-of-treatment visit (EOT)](#_Toc17206) 18

[9.1.4 Safety follow-up visits](#_Toc18789) 18

[9.1.5 Survival follow-up](#_Toc14620) 18

[9.2 Efficacy evaluation](#_Toc4062) 18

[9.3 Safety evaluation](#_Toc21462) 19

[10. adverse reactions and dose adjustment](#_Toc16740) 19

[10.1 Nab-POF regimen dose adjustment](#_Toc21967) 19

[10.2 PD-1 antibody dose adjustment (refer to the package insert of carfilzomib)](#_Toc9470) 21

[11. concomitant treatment](#_Toc26383) 21

[12. Participants complete/withdraw early](#_Toc21298) 21

[12.1 Completion](#_Toc29755) 21

[12.2 Early termination of treatment/withdrawal](#_Toc11125) 21

[13. Statistical analysis](#_Toc5810) 22

[13.1 Study population](#_Toc17004) 22

[13.2 Statistical methods](#_Toc22107) 22

[14. Adverse event reporting](#_Toc30440) 23

[14.1 Definitions](#_Toc23331) 23

[14.1.1 Definition and classification of adverse events](#_Toc3069) 23

[14.1.2 Definition of causality](#_Toc4930) 24

[14.1.3 Criteria for judging severity](#_Toc22698) 24

[14.2 Adverse event reporting](#_Toc15544) 24

[14.2.1 All adverse events](#_Toc25068) 24

[14.2.2 Serious adverse events](#_Toc29604) 25

[14.2.3 Pregnancy](#_Toc6704) 25

[14.3 Safety issues](#_Toc13411) 25

15. [Ethics](#_Toc6521) 25

[15.1 Responsibilities of researchers](#_Toc30616) 25

[15.3 Informed consent](#_Toc31685) 26

[15.4 Confidentiality of personal data](#_Toc32657) 27

16. [References](#_Toc16233) 27

**Synopsis**

**[Phase II Clinical Study of Camrelizumab, a PD-1 Antibody, in Combination with Nab-POF Regimen for Conversion Therapy in Unresectable Locally Advanced or Single-Site Limited Metastatic Gastric Cancer: FDZL-GC 001 Trial]**

**Study Objective**

The objective of this study is to evaluate the efficacy and safety of domestic PD-1 antibody in combination with the Nab-POF regimen as conversion therapy for unresectable locally advanced or limited metastatic gastric cancer.

**Primary Efficacy Endpoint of This Study:**

- R0 resection rate (R0 resection refers to the absence of residual tumor cells in the proximal, distal, and circumferential margins under a microscope after resection of the primary gastric lesion, and negative microscopic margins of simultaneously resected metastatic lesions, or complete ablation of metastatic lesions after local treatment such as radiofrequency ablation/SBRT [lesion disappearance or no enhancement on enhanced CT/MRI])

**Secondary Efficacy Endpoints of This Study:**

- total CR rate: the proportion of the patients with pCR or cCR (pCR refers to the absence of residual cancer cells in the primary lesion, regional lymph nodes, and simultaneously resected metastatic lesions; cCR refers to the disappearance of tumor lesions as assessed by imaging, absence of cancer cells detected in endoscopic biopsy)Major pathological response (MPR) rate
- pCR
- Major pathological response (MPR, pathological complete regression or < 10% residual tumor per tumor bed) rate
- Overall response rate (ORR, i.e., the proportion of CR and PR)
- Disease control rate (DCR=CR+PR+SD)
- Safety
- Surgery complications: anastomotic leak, haemorrhage, stenosis, etc.
- Progression-free survival (PFS)
- Overall survival (OS)
- Health-related quality of life
- Exploratory analysis of imaging examinations such as PET-CT, tissue/blood biomarker detection, and their correlation with efficacy/prognosis

**Study Design**

This study is an open, single-center, prospective phase II clinical study. This study will be conducted in our center with a planned enrollment of 43 patients.

**Inclusion Criteria**

Subjects meeting one or more of the following criteria will not be eligible for this study:

- Age: Males or females aged ≥ 18 years;
- Histologically or cytologically confirmed gastric adenocarcinoma (including GEJ adenocarcinoma);
- Presence of measurable or assessable lesions;
- Unresectable locally advanced gastric cancer (imaging stage T4b and/or second station lymph nodes >3 cm or fused into a mass) or locally metastatic gastric cancer with any of the following single-site metastases as shown by CT or MRI:
  - Retroperitoneal lymph node metastasis (RPLM) (e.g., para-aortic, aortocaval, para-pancreatic, or mesenteric lymph nodes) and/or the following distant metastases
  - Unilateral or bilateral Krukenberg neoplasm;
  - 1-5 metastases to liver, with the maximum lesion diameter not exceeding 5 cm;
  - 1-5 metastases to lung, with the maximum lesion diameter not exceeding 5 cm;
  - Metastases to adrenals;
  - Extra-abdominal metastases to lymph nodes such as supraclavicular, cervical, or mediastinal lymph nodes that can be included in one radiation field;
  - Single-site metastases to peritoneum as confirmed by surgical exploration, such as P1;
  - Other site metastases considered as limited by the investigator;
- Patients who have not received other anti-neoplasm therapy;
- ECOG PS score: 0-1;
- Expected survival ≥ 3 months;
- Normal major organ function or reserve, meeting the following criteria (determined by laboratory test data within 7 days (inclusive) before screening): HB ≥90 g/dL, ANC ≥1.5×109/L, PLT ≥100×109/L; BIL<1.5×ULN, ALT and AST <2.5×ULN, if with metastases to liver, then ALT, AST <5×ULN; serum Cr≤1×ULN, endogenous creatinine clearance >50 mL/min (calculated by CK formula); international normalized ratio (INR) or prothrombin time (PT) ≤1.5×ULN; if the subject is receiving anticoagulant therapy, PT should be within the intended range of the anticoagulant drug;
- Subjects who voluntarily participate in this study, sign the informed consent form, have good compliance, and cooperate with follow-up.

**Exclusion Criteria**

Subjects meeting the following criteria must withdraw from study treatment:

- History of other malignant neoplasms within 3 years prior to enrollment, except for cured cervical carcinoma in situ or basal cell carcinoma;
- Presence of brain metastases to meninges;
- Malignant pleural or peritoneal effusion;
- Presence of gastrointestinal obstruction, gastrointestinal haemorrhage (fecal occult blood +++ or higher), or perforation;
- Prior treatment with anti-PD-1, anti-PD-L1, or anti-PD-L2, CD137, CTLA-4 antibodies, or any other antibody or drug specifically targeting T-cell co-stimulatory or checkpoint pathways;
- Subjects with active or history of autoimmune diseases that might relapse (e.g., systemic lupus erythematosus, rheumatoid arthritis, inflammatory bowel disease, autoimmune thyroid disorder, multiple sclerosis, vasculitis, glomerulonephritis, etc.), or high-risk patients (e.g., those requiring immunosuppression after organ transplant), except for those with vitiligo, psoriasis, alopecia, or Graves' disease that have not required systemic treatment within the past 2 years, or hypothyroidism requiring only thyroid hormone replacement therapy, or Type I diabetes mellitus requiring only insulin replacement therapy;
- Current interstitial lung disorder or pneumonia, pulmonary fibrosis, acute lung disorder, or radiation pneumonitis;
- Participation in other drug clinical studies within 4 weeks prior to the first dose (based on the use of investigational drug), except observational (non-interventional) clinical studies;
- Use of immunosuppressant drugs within 4 weeks prior to the first dose of study treatment, excluding nasal, inhaled, or other topical glucocorticoids or physiological doses of systemic glucocorticoids (i.e., no more than 10 mg/day of prednisone or equivalent dose of other glucocorticoids), or short-term (no more than 7 days) use of glucocorticoids for the prevention or treatment of non-autoimmune allergic diseases;
- Receipt of live attenuated vaccines within 4 weeks prior to the first dose of study treatment or planned immunization during the study period. Note: Inactivated seasonal influenza vaccines for injection are allowed within 4 weeks prior to the first dose; however, live attenuated influenza vaccines are not allowed.
- Major surgery (craniotomy, thoracotomy, or laparotomy) within 4 weeks prior to the first dose of study treatment or anticipated need for major surgery (not related to this study) during the study treatment period.
- History of human immunodeficiency virus (HIV) infection (i.e., HIV antibody positive), or other acquired or congenital immunodeficiency diseases, or history of organ transplant or stem cell transplant;
- Active chronic hepatitis B or active hepatitis C; hepatitis B virus carriers, but patients with stable hepatitis B viral loads after drug therapy (HBV DNA ≤ 200 IU/mL or copy number < 1000 copies/mL), and patients who have cleared hepatitis C virus (HCV RNA negative) are eligible for enrollment;
- Known active pulmonary tuberculosis;
- Patients with severe infection within 4 weeks before the first dose, or active infection requiring oral or vein antibiotic therapy within 2 weeks before the first dose;
- Symptomatic congestive cardiac failure (New York Heart Association Class II-IV) or symptomatic or poorly controlled arrhythmia;
- Uncontrolled hypertension (blood pressure systolic ≥160 mmHg or blood pressure diastolic ≥100 mmHg) despite standard treatment;
- Any arterial embolism event within 6 months before enrollment, including myocardial infarction, angina unstable, cerebrovascular accident, or transient ischemic attack;
- History of deep vein thrombosis, pulmonary embolism, or any other severe embolism within 3 months before enrollment (thrombosis originating from implanted venous access port or catheter, or superficial vein thrombosis is not considered as "severe" thromboembolism);
- History of definite neurological or mental disorder: such as epilepsy, dementia, poor compliance, or peripheral nervous system disorders;
- Alcohol dependence or history of drug addiction or drug abuse within the past year;
- Pregnant or lactating women; women of childbearing potential who are not taking adequate contraception;

Other acute or chronic disease, mental disorder, or laboratory test abnormality that might lead to the following results: increased risk associated with study participation or study drug administration, or interference with the interpretation of study results, and the investigator judges the patient to be ineligible for participation in this study.

**Study Flow:**

Patients with locally advanced unresectable metastatic gastric cancer who meet the inclusion criteria will receive conversion therapy of PD-1 in combination with Nab-POF regimen, HER-2 positive patients will receive additional treatment with Herceptin. The regimen is repeated every 2 weeks, and tumor efficacy assessment will be performed every 3 treatment cycles. Patients will undergo evaluation by both surgical and medical experts for surgical resectability after 6 cycles, and if confirmed feasible for surgical resection, they will undergo surgery within 3-6 weeks after completion of chemotherapy. After successful conversion, these patients will undergo radical gastrectomy; for patients with liver metastases, simultaneous or staged resection or radiofrequency ablation or SBRT may be performed; for patients with peritoneal limited metastasis and adrenal metastasis, simultaneous resection may be performed; for patients with ovarian metastasis, simultaneous or staged surgery may be performed; for patients with lung metastasis, staged surgery or radiofrequency ablation or SBRT may be performed; and for patients with distant lymph node metastasis, postoperative radiation therapy for lymph node metastasis may be performed. Patients with good postoperative recovery will continue immunotherapy in combination with chemotherapy for 3-6 weeks, with a maximum of 12 cycles for chemotherapy and a maximum of 1 year for immunotherapy. After surgery, for patients who cannot tolerate the three-drug chemotherapy, the investigator will determine to use the two-drug combination therapy or single-agent chemotherapy with 5-Fu/capecitabine/tegafur, or early termination. Patients who are assessed as having progressive disease (PD) at any evaluation will be considered treatment failures and will be withdrawn from the study; if the patient has no PD after 6 cycles of treatment but does not meet the criteria for resection, he/she will continue the conversion therapy for an additional 3 cycles, followed by reevaluation for resectability. If resectable, they will undergo surgery; if still unresectable, they will be assessed as unsuccessful conversion, and will continue to receive subsequent treatment based on palliative care principles until PD or intolerable toxicity. If the treatment response is CR, the investigator will decide, after consultation with the patients, to perform surgical resection of the primary site of gastric cancer and regional lymph nodes, or to continue chemotherapy in combination with immunotherapy (without surgery, continuing chemotherapy for 3-4 cycles after CR, and immunotherapy until PD or a total of 12 times or more, up to a maximum of 1 year); if radiofrequency ablation or stereotactic radiotherapy is required for the metastatic lesions, it should be arranged before or after surgery of the primary gastric lesion based on clinical needs. Continuous monitoring and evaluation of drug efficacy and safety will be conducted throughout the entire study period, including a 30-day follow-up period.

**Dosage and Administration**

For PD-1 antibody, the medicine product camrelizumab injection of Jiangsu Hengrui is selected and provided free of charge for conversion therapy. For nab-paclitaxel, Aiyue of Jiangsu Hengrui is selected and provided free of charge for 1 treatment course, and then the patient will decide whether to buy 2 courses of treatment during conversion therapy, and so on. Other domestically marketed drugs are used through normal medical channels, either through medical insurance or self-payment.

| Camrelizumab | 200 mg/dose | ivgtt over 30-60 minutes on d1 |
| --- | --- | --- |
| Nab-paclitaxel (Aiyue) | 125 mg/m² | ivgtt, over 30 minutes before oxaliplatin on d1 |
| Oxaliplatin | 85 mg/m² | ivgtt over 2 hours, d1 |
| 5-FU | 2.4 g/m² | Civ over 48 hours from d1 onwards |
| HER-2 positive patients will receive additional treatment with Herceptin. | | |
| Herceptin | The initial dose is 6 mg/Kg, followed by 4 mg/Kg. | Ivgtt, d1 |
| The regimen is repeated every 2 weeks. Efficacy will be assessed every 3 cycles. If there is clinical suspicion of progression, early assessment can be conducted. | | |

**Schedule of Study Progress**

Planned enrollment of 43 cases: 3-4 cases per month, completing enrollment within 1 year and concluding the entire study in 2 years

**Statistical Analysis**

Descriptive statistics will be used to analyze all data, including demographics, baseline, each efficacy evaluation indicator, and all safety data. For measurement data, the mean, standard deviation, number of responding subjects, median, maximum and minimum values will be described, and the 95% confidence interval (CI) of the mean will be calculated; for enumeration data, the frequency and percentage will be described, and the 95% CI of the percentage will be calculated.

According to the Flot3 study, which used the FLOT regimen for conversion therapy and achieved an R0 surgical resection rate of 48% (29/60), we will adopt the Nab-POF regimen in combination with immunotherapy in the present study, and aim to increase the R0 resection rate to 70%. Based on the rate comparison of PASS software, with a power of 0.8 and a significance level of 0.05 in a two-sided test, we will need a sample size of 39 cases, and assuming a dropout rate of 10%, we will need a sample size of 43 cases. Since the FLOT3 study did not specify the HER2 positive or negative status of the enrolled patients, we will ensure that 43 patients with HER2-negative status are enrolled, with no limit on the number of HER2-positive patients.

**1. Study Background**

Gastric cancer is one of the common malignant neoplasms of the digestive tract, particularly in East Asia and the Middle East. It poses a serious threat to human health. In China, most gastric cancer patients are diagnosed at an advanced stage, making radical surgery impossible and significantly reducing the chance of cure. Treatment mainly relies on systemic therapy to prolong patient survival and improve their quality of life. Although new chemotherapy drugs and molecular targeted drugs have effectively improved the prognosis of unresectable gastric cancer [1], it is still far below that of patients with advanced gastric cancer who achieve R0 resection. This necessitates a re-evaluation and adjustment of treatment strategies for advanced gastric cancer, especially the exploration of effective conversion therapy for limited metastatic gastric cancer, which is a research direction worth pursuing [2-4].

Since 2013, immune checkpoint inhibitors (ICIs) have demonstrated potent anti-tumor activity in the treatment of various solid neoplasms such as melanoma, non-small cell lung cancer, renal cancer, and prostate cancer [5-7]. With their continuous advancement in utilization from the last-line treatment, how to apply them at an earlier stage to cure neoplasms has become a topic of vital concern in oncology. Unlike traditional cancer treatment methods, ICIs target the body's immune system rather than tumor cells, and aim to restore and enhance the function of effector T cells to specifically recognize and kill tumor cells, thereby systematically enhancing the body's anti-tumor immune response. Currently, research into the CTLA-4 and PD-1/PD-L1 immune checkpoint pathways is relatively thorough, and several drugs have been developed. Among them, through the ATTRACTION-02 and KEYNOTE-059 (Cohort 1) studies [8,9], the PD-1 antibodies Nivolumab and Pembrolizumab have become standard treatment options for third-line therapy in advanced gastric or gastroesophageal junction (GEJ) adenocarcinoma. Furthermore, in Cohort 2 of the KEYNOTE-059 study [10], results showed that in 25 patients with advanced gastric cancer who received first-line Pembrolizumab + 5-FU + Cisplatin, the objective response rate (ORR) reached 60%, and the disease control rate (DCR) was 92%. The ORR for PD-L1+ patients was 68.8%, and the ORR for PD-L1- patients was 37.5%. In light of this, MSD conducted the Phase III clinical study investigating first-line chemotherapy in combination with PD-1 for unresectable advanced gastric cancer (KEYNOTE-062). The study enrolled patients with locally advanced, unresectable, or metastatic gastric or GEJ adenocarcinoma who were HER2-negative with PD-L1 CPS≥1. Patients were randomly assigned in a 1:1:1 ratio to receive Pembrolizumab monotherapy 200 mg q3w (up to 35 cycles, abbreviated as P group), Pembrolizumab 200 mg q3w (up to 35 cycles) + chemotherapy (abbreviated as P+C group), or placebo + chemotherapy (abbreviated as C group). Patients continued treatment until they experienced intolerable toxicity, disease progression, or withdrawal as per the investigator/patient’s decision. The primary endpoints were OS and PFS, and secondary endpoints included ORR and safety. Although the study results showed that Pembrolizumab in combination with chemotherapy did not meet the primary endpoint of prolonged OS, the response rates were significantly improved in both CPS≥1 and ≥10 patients, demonstrating that PD-1 in combination with chemotherapy is still suitable for exploration in conversion therapy.

Building upon explorations in advanced gastric cancer, the application of ICIs in the perioperative treatment of gastric cancer is gradually unfolding. Examples include the CHECKMATE-577 Phase III study, which enrolled Stage III patients after D2 radical gastrectomy for gastric cancer and compared Nivolumab to placebo; and the KEYNOTE-585 study, which investigated Pembrolizumab in combination with chemotherapy (XP or FP) versus Pembro + placebo as perioperative treatment for patients with GEJ adenocarcinoma. Additionally, several single-arm Phase II studies are also investigating the perioperative treatment of gastric cancer/ GEJ adenocarcinoma with different ICIs in combination with chemotherapy, such as the ICONIC study conducted with FLOT + Avelumab, the EGA study conducted with mDCF in combination with Avelumab, and the MISP#52216 study conducted with FOLFOX in combination with Pembrolizumab. All of these studies are currently recruiting participants.

When using ICIs, other drugs may be needed to help trigger the immune system and improve treatment efficacy. Although many chemotherapy drugs have immunosuppressive effects, some can trigger the host's immune system and stimulate anti-tumor T cell responses. Taxanes are commonly used chemotherapy drugs for solid tumors, and function by stabilizing microtubules and inhibiting cell dissociation. They also have the effects of lipopolysaccharide mimetics, which can stimulate macrophage-mediated tumor cell killing. They can also trigger long-term immune activation effects, increasing tumor-infiltrating lymphocytes (TILs). Additionally, taxanes are potent immune activators that can activate CD8+ T cells and reduce the effects of immunosuppressive cells, such as regulatory T cells. Studies have also shown that taxanes can modulate multiple functions of the immune system, including lymph cell recruitment and promoting the release of immune-enhancing cytokines such as IL-12, IFNΥ, TNFα, and GMCSF, all of which may increase the anti-tumor activity of immunotherapy. Notably, the nanoparticle albumin-bound (nab-) paclitaxel, with nano-microparticle albumen as a carrier and a modified solvent, improves efficacy while reducing toxicity compared to traditional taxanes. Basic research shows that nab-paclitaxel in combination with immunotherapy has a synergistic mechanism of action. The IMpassion130 study, from a clinical research perspective, further confirmed the superior efficacy of immunotherapy in combination with nab-paclitaxel, bringing a new option for the first-line treatment of metastatic triple-negative breast cancer [11]. Currently, multiple studies on nab-paclitaxel in combination with immunotherapy are underway, and nab-paclitaxel, as the best combination partner for immunotherapy, is writing a new chapter in the treatment of breast cancer patients. In advanced lung squamous cell carcinoma, the KEYNOTE-407 study also confirmed the significant efficacy of nab-paclitaxel in combination with immunotherapy, and it was recently approved for the first-line treatment of advanced lung squamous cell carcinoma [12].

In recent years, the series of studies for FLOT regimen has garnered significant attention in the treatment of gastric cancer [13-16]. Based on docetaxel + oxaliplatin + fluorouracil (FU), the study scope ranges from extensive metastatic gastric cancer and locally advanced gastric cancer to perioperative treatment encompassing resectable gastric cancer. Notably, the ORR in patients with limited metastatic gastric cancer is approximately 43% to 55%. The quality-of-life scores for the three-drug FLOT regimen are comparable to those of the two-drug FLO regimen (oxaliplatin + FU). The pathological complete response (pCR) rate for limited metastatic gastric cancer is around 11% to 20%, with a conversion to surgery rate of approximately 60%. The FLOT regimen demonstrates clear advantages in terms of R0 resection rate. Building upon FLOT3, the FLOT5 Phase III study, focusing on the conversion of limited metastatic gastric cancer, is currently ongoing [17].

Solvent-based paclitaxel has become one of the standard second-line chemotherapy regimens for advanced gastric cancer [18]. Compared to solvent-based paclitaxel, nab-paclitaxel enhances its solubility and eliminates the need for pre-treatment, thereby avoiding solvent-related adverse reactions. Additionally, routine hormone use is not required before nab-paclitaxel treatment, preventing any reduction in the efficacy of immunotherapy. Furthermore, at the same dosage, nab-paclitaxel exhibits significantly lower toxicity than conventional paclitaxel. In this study, we will employ a dosage close to that of conventional paclitaxel, as excessively strong chemotherapy leading to a significant decrease in leucocytes and immunosuppression may adversely affect the efficacy of immunotherapy.

Therefore, this study aims to investigate the use of the Nab-POF regimen (nab-paclitaxel + oxaliplatin + fluorouracil, Nab-POF) + domestic PD-1 antibody in patients with limited metastatic gastric cancer, with the goal of further improving the pCR and resection rate under conversion therapy in this type of gastric cancer.

**2. Study Objective**

The objective of this study is to evaluate the efficacy and safety of domestic PD-1 antibody in combination with the Nab-POF regimen as conversion therapy for unresectable locally advanced or limited metastatic gastric cancer.

**Primary Efficacy Endpoint of This Study:**

- R0 resection rate (R0 resection refers to the absence of residual tumor cells in the proximal, distal, and circumferential margins under a microscope after resection of the primary gastric lesion, and negative microscopic margins of simultaneously resected metastatic lesions, or complete ablation of metastatic lesions after local treatment such as radiofrequency ablation/SBRT [lesion disappearance or no enhancement on enhanced CT/MRI])

**Secondary Efficacy Endpoints of This Study:**

- total CR rate: the proportion of the patients with pCR or cCR (pCR refers to the absence of residual cancer cells in the primary lesion, regional lymph nodes, and simultaneously resected metastatic lesions; cCR refers to the disappearance of tumor lesions as assessed by imaging, absence of cancer cells detected in endoscopic biopsy)Major pathological response (MPR) rate
- pCR
- Major pathological response (MPR, pathological complete regression or < 10% residual tumor per tumor bed) rate
- Overall response rate (ORR, i.e., the proportion of CR and PR)
- Disease control rate (DCR=CR+PR+SD)
- Safety
- Surgery complications: anastomotic leak, haemorrhage, stenosis, etc.
- Progression-free survival (PFS)
- Overall survival (OS)
- Health-related quality of life
- Exploratory analysis of imaging examinations such as PET-CT, tissue/blood biomarker detection, and their correlation with efficacy/prognosis

**3. Study Design**

This study is an open-label, single-center, prospective Phase II clinical study designed to evaluate the efficacy and safety of the domestic PD-1 antibody in combination with Nab-POF regimen for conversion therapy in patients with unresectable locally advanced or locally metastatic gastric cancer.

According to the Flot3 study, which used the FLOT regimen for conversion therapy and achieved an R0 surgical resection rate of 48% (29/60), we will adopt the Nab-POF regimen in combination with immunotherapy in the present study, and aim to increase the R0 resection rate to 70%. Based on the rate comparison of PASS software, with a power of 0.8 and a significance level of 0.05 in a two-sided test, we will need a sample size of 39 cases, and assuming a dropout rate of 10%, we will need a sample size of 43 cases. Since the FLOT3 study did not specify the HER2 positive or negative status of the enrolled patients, we will ensure that 43 patients with HER2-negative status are enrolled, with no limit on the number of HER2-positive patients.

This study will be conducted at our site, with a planned enrollment of 43 patients.

Patients with unresectable locally advanced or limited metastatic gastric cancer who have not received prior treatment will be enrolled to receive treatment with the domestic PD-1 in combination with Nab-POF regimen. HER-2 positive patients will receive additional treatment with Herceptin. Tumor efficacy assessment will be performed every 3 treatment cycles. Patients will undergo evaluation by both surgical and medical experts for surgical resectability after 6 cycles, and if confirmed feasible for surgical resection, they will undergo surgery within 3-6 weeks after completion of chemotherapy. After successful conversion, these patients will undergo radical gastrectomy; for patients with liver metastases, simultaneous or staged resection or radiofrequency ablation or SBRT may be performed; for patients with peritoneal limited metastasis and adrenal metastasis, simultaneous resection may be performed; for patients with ovarian metastasis, simultaneous or staged surgery may be performed; for patients with lung metastasis, staged surgery or radiofrequency ablation or SBRT may be performed; and for patients with distant lymph node metastasis, postoperative radiation therapy for lymph node metastasis may be performed. Patients with good postoperative recovery will continue immunotherapy in combination with chemotherapy for 3-6 weeks, with a maximum of 12 cycles for chemotherapy and a maximum of 1 year for immunotherapy. After surgery, for patients who cannot tolerate the three-drug chemotherapy, the investigator will determine to use the two-drug combination therapy or single-agent chemotherapy with 5-Fu/capecitabine/tegafur, or early termination. Patients who are assessed as having progressive disease (PD) at any evaluation will be considered treatment failures and will be withdrawn from the study; if the patient has no PD after 6 cycles of treatment but does not meet the criteria for resection, he/she will continue the conversion therapy for an additional 3 cycles, followed by reevaluation for resectability. If resectable, they will undergo surgery; if still unresectable, they will be assessed as unsuccessful conversion, and will continue to receive subsequent treatment based on palliative care principles until PD or intolerable toxicity. The efficacy and safety of the drug will be continuously monitored and evaluated throughout the entire study period, including a 30-day follow-up period. Forty-three cases are planned to be enrolled: 3-4 cases per month, with inclusion to be completed in 1 year, and the study to be ended in 2 years.

**4. Study Population**

**4.1 Inclusion Criteria**

Subjects must meet all of the following criteria to be eligible for this study:

- Age: Males or females aged ≥ 18 years;
- Histologically or cytologically confirmed gastric adenocarcinoma (including GEJ adenocarcinoma);
- Presence of measurable or assessable lesions;
- Unresectable locally advanced gastric cancer (imaging stage T4b and/or second station lymph nodes >3 cm or fused into a mass) or locally metastatic gastric cancer with any of the following single-site metastases as shown by CT or MRI:
  - Retroperitoneal lymph node metastasis (RPLM) (e.g., para-aortic, aortocaval, para-pancreatic, or mesenteric lymph nodes) and/or the following distant metastases
  - Unilateral or bilateral Krukenberg neoplasm;
  - 1-5 metastases to liver, with the maximum lesion diameter not exceeding 5 cm;
  - 1-5 metastases to lung, with the maximum lesion diameter not exceeding 5 cm;
  - Metastases to adrenals;
  - Extra-abdominal metastases to lymph nodes such as supraclavicular, cervical, or mediastinal lymph nodes that can be included in one radiation field;
  - Single-site metastases to peritoneum as confirmed by surgical exploration, such as P1;
  - Other site metastases considered as limited by the investigator;
- Patients who have not received other anti-neoplasm therapy;
- ECOG PS score: 0-1;
- Expected survival ≥ 3 months;
- Normal major organ function or reserve, meeting the following criteria (determined by laboratory test data within 7 days (inclusive) before screening): HB ≥90 g/dL, ANC ≥1.5×109/L, PLT ≥100×109/L; BIL<1.5×ULN, ALT and AST <2.5×ULN, if with metastases to liver, then ALT, AST <5×ULN; serum Cr≤1×ULN, endogenous creatinine clearance >50 mL/min (calculated by CK formula); international normalized ratio (INR) or prothrombin time (PT) ≤1.5×ULN; if the subject is receiving anticoagulant therapy, PT should be within the intended range of the anticoagulant drug;
- Subjects who voluntarily participate in this study, sign the informed consent form, have good compliance, and cooperate with follow-up.

**4.2 Exclusion Criteria**

Subjects meeting one or more of the following criteria will not be eligible for this study:

- History of other malignant neoplasms within 3 years prior to enrollment, except for cured cervical carcinoma in situ or basal cell carcinoma;
- Presence of brain metastases to meninges;
- Malignant pleural or peritoneal effusion;
- Presence of gastrointestinal obstruction, gastrointestinal haemorrhage (fecal occult blood +++ or higher), or perforation;
- Prior treatment with anti-PD-1, anti-PD-L1, or anti-PD-L2, CD137, CTLA-4 antibodies, or any other antibody or drug specifically targeting T-cell co-stimulatory or checkpoint pathways;
- Subjects with active or history of autoimmune diseases that might relapse (e.g., systemic lupus erythematosus, rheumatoid arthritis, inflammatory bowel disease, autoimmune thyroid disorder, multiple sclerosis, vasculitis, glomerulonephritis, etc.), or high-risk patients (e.g., those requiring immunosuppression after organ transplant), except for those with vitiligo, psoriasis, alopecia, or Graves' disease that have not required systemic treatment within the past 2 years, or hypothyroidism requiring only thyroid hormone replacement therapy, or Type I diabetes mellitus requiring only insulin replacement therapy;
- Current interstitial lung disorder or pneumonia, pulmonary fibrosis, acute lung disorder, or radiation pneumonitis;
- Participation in other drug clinical studies within 4 weeks prior to the first dose (based on the use of investigational drug), except observational (non-interventional) clinical studies;
- Use of immunosuppressant drugs within 4 weeks prior to the first dose of study treatment, excluding nasal, inhaled, or other topical glucocorticoids or physiological doses of systemic glucocorticoids (i.e., no more than 10 mg/day of prednisone or equivalent dose of other glucocorticoids), or short-term (no more than 7 days) use of glucocorticoids for the prevention or treatment of non-autoimmune allergic diseases;
- Receipt of live attenuated vaccines within 4 weeks prior to the first dose of study treatment or planned immunization during the study period. Note: Inactivated seasonal influenza vaccines for injection are allowed within 4 weeks prior to the first dose; however, live attenuated influenza vaccines are not allowed.
- Major surgery (craniotomy, thoracotomy, or laparotomy) within 4 weeks prior to the first dose of study treatment or anticipated need for major surgery (not related to this study) during the study treatment period.
- History of human immunodeficiency virus (HIV) infection (i.e., HIV antibody positive), or other acquired or congenital immunodeficiency diseases, or history of organ transplant or stem cell transplant;
- Active chronic hepatitis B or active hepatitis C; hepatitis B virus carriers, but patients with stable hepatitis B viral loads after drug therapy (HBV DNA ≤ 200 IU/mL or copy number < 1000 copies/mL), and patients who have cleared hepatitis C virus (HCV RNA negative) are eligible for enrollment;
- Known active pulmonary tuberculosis;
- Patients with severe infection within 4 weeks before the first dose, or active infection requiring oral or vein antibiotic therapy within 2 weeks before the first dose;
- Symptomatic congestive cardiac failure (New York Heart Association Class II-IV) or symptomatic or poorly controlled arrhythmia;
- Uncontrolled hypertension (blood pressure systolic ≥160 mmHg or blood pressure diastolic ≥100 mmHg) despite standard treatment;
- Any arterial embolism event within 6 months before enrollment, including myocardial infarction, angina unstable, cerebrovascular accident, or transient ischemic attack;
- History of deep vein thrombosis, pulmonary embolism, or any other severe embolism within 3 months before enrollment (thrombosis originating from implanted venous access port or catheter, or superficial vein thrombosis is not considered as "severe" thromboembolism);
- History of definite neurological or mental disorder: such as epilepsy, dementia, poor compliance, or peripheral nervous system disorders;
- Alcohol dependence or history of drug addiction or drug abuse within the past year;
- Pregnant or lactating women; women of childbearing potential who are not taking adequate contraception;
- Other acute or chronic disease, mental disorder, or laboratory test abnormality that might lead to the following results: increased risk associated with study participation or study drug administration, or interference with the interpretation of study results, and the investigator judges the patient to be ineligible for participation in this study.

**4.3 Withdrawal Criteria**

Subjects meeting the following criteria must withdraw from study treatment:

- Pregnancy events during the study;
- PD as per imaging evaluation;
- Withdrawal from the study as requested by the subject;

Treatment delayed for more than two weeks for any reason during induction therapy (referring to the delay of all drugs in the treatment regimen);

Other circumstances that the investigator deems necessary to withdraw the subject from the study.

**4.4 Removal Criteria**

Those who are not enrolled and do not complete examination and treatment according to the above subject screening criteria and study protocol;

Poor compliance, i.e., those who do not receive treatment according to the study protocol or switch to other chemical drug therapy during the study;

Missing primary indicators, i.e., those who have been wrongly enrolled due to significantly incomplete study data.

**5. Dosage and Administration**

For PD-1 antibody, the medicine product camrelizumab injection of Jiangsu Hengrui is selected and provided free of charge for conversion therapy. For nab-paclitaxel, Aiyue of Jiangsu Hengrui is selected and provided free of charge for 1 treatment course, and then the patient will decide whether to buy 2 courses of treatment during conversion therapy, and so on. Other domestically marketed drugs are used through normal medical channels, either through medical insurance or self-payment.

| Camrelizumab | 200 mg/dose | ivgtt over 30-60 minutes on d1 |
| --- | --- | --- |
| Nab-paclitaxel (Aiyue) | 125 mg/m² | ivgtt, over 30 minutes before oxaliplatin on d1 |
| Oxaliplatin | 85 mg/m² | ivgtt over 2 hours, d1 |
| 5-FU | 2.4 g/m² | Civ over 48 hours from d1 onwards |
| HER-2 positive patients will receive additional treatment with Herceptin. | | |
| Herceptin | The initial dose is 6 mg/Kg, followed by 4 mg/Kg. | Ivgtt, d1 |
| The regimen is repeated every 2 weeks. Efficacy will be assessed every 3 cycles. If there is clinical suspicion of progression, early assessment can be conducted. | | |

**6. Study Flow:**

Patients with locally advanced unresectable metastatic gastric cancer who meet the inclusion criteria will receive conversion therapy of PD-1 in combination with Nab-POF regimen, HER-2 positive patients will receive additional treatment with Herceptin. The regimen is repeated every 2 weeks, and tumor efficacy assessment will be performed every 3 treatment cycles. Patients will undergo evaluation by both surgical and medical experts for surgical resectability after 6 cycles, and if confirmed feasible for surgical resection, they will undergo surgery within 3-6 weeks after completion of chemotherapy. After successful conversion, these patients will undergo radical gastrectomy; for patients with liver metastases, simultaneous or staged resection or radiofrequency ablation or SBRT may be performed; for patients with peritoneal limited metastasis and adrenal metastasis, simultaneous resection may be performed; for patients with ovarian metastasis, simultaneous or staged surgery may be performed; for patients with lung metastasis, staged surgery or radiofrequency ablation or SBRT may be performed; and for patients with distant lymph node metastasis, postoperative radiation therapy for lymph node metastasis may be performed. Patients with good postoperative recovery will continue immunotherapy in combination with chemotherapy for 3-6 weeks, with a maximum of 12 cycles for chemotherapy and a maximum of 1 year for immunotherapy. After surgery, for patients who cannot tolerate the three-drug chemotherapy, the investigator will determine to use the two-drug combination therapy or single-agent chemotherapy with 5-Fu/capecitabine/tegafur, or early termination. Patients who are assessed as having progressive disease (PD) at any evaluation will be considered treatment failures and will be withdrawn from the study; if the patient has no PD after 6 cycles of treatment but does not meet the criteria for resection, he/she will continue the conversion therapy for an additional 3 cycles, followed by reevaluation for resectability. If resectable, they will undergo surgery; if still unresectable, they will be assessed as unsuccessful conversion, and will continue to receive subsequent treatment based on palliative care principles until PD or intolerable toxicity. If the treatment response is CR, the investigator will decide, after consultation with the patients, to perform surgical resection of the primary site of gastric cancer and regional lymph nodes, or to continue chemotherapy in combination with immunotherapy (without surgery, continuing chemotherapy for 3-4 cycles after CR, and immunotherapy until PD or a total of 12 times or more, up to a maximum of 1 year); if radiofrequency ablation or stereotactic radiotherapy is required for the metastatic lesions, it should be arranged before or after surgery of the primary gastric lesion based on clinical needs. Continuous monitoring and evaluation of drug efficacy and safety will be conducted throughout the entire study period, including a 30-day follow-up period.

Criteria for resectability:

(1) For patients with locally advanced gastric cancer: the lesion has regressed without vascular invasion, and the tumor lesion and regional lymph nodes can be completely resected technically (R0 resection) as assessed by the surgical expert;

(2) For patients with limited metastatic gastric cancer with a single metastatic site: efficacy is evaluated as CR or PR, and primary and metastatic lesions can be R0 resection as assessed by a surgical expert, or primary lesion is resectable and metastatic lesion can achieve no evidence of disease (NED) through radiofrequency ablation or stereotactic radiotherapy; patients with a response evaluation of CR should be confirmed by gastroscopy.

**7. Compliance**

Throughout the study, investigators should emphasize to the subjects or their guardians the importance of accurate and timely medical visits to receive surgery or drug therapy.

**8. Associated Diseases and Concomitant Medication****s**

Associated diseases: any disease that existed at the start of the trial (i.e., first visit).

Concomitant medications: any other drug given during the trial, except for the investigational drug.

All assocaited diseases and concomitant medications must be recorded in detail at the time of entry into the trial (i.e., first visit). Any changes in concomitant medications must be recorded in detail at each visit. If such changes affect the eligibility of the subject to continue participation in the trial, the sponsor must be notified.

At least the following information should be collected for each combination drug: generic name, dose, start date, stop date or duration of use, and indication.

**9. Study Evaluation**

**9.1 Study Procedures**

**9.1.1 Screening period/baseline (-2W-0)**

Researchers must explain to each participant the risks and requirements of this clinical study, as well as complete information about receiving treatment according to the trial protocol and their role in the trial. Researchers should also explain the purpose and requirements of this clinical study to each participant, encouraging them to ask questions regarding the trial. Before proceeding with all relevant trial steps, all participants who voluntarily join the trial must read and sign an informed consent form for participating in this clinical study. After obtaining the signed informed consent form from the participant, the researcher will determine whether the participant meets the eligibility criteria based on inclusion and exclusion criteria. Once the researcher determines that the participant is suitable for the trial, they must complete the following assessments and procedures:

- Explain and obtain informed consent;
- Medical history inquiry and record;
- Physical signs, physical examination, weight and height examination;
- Laboratory tests (complete blood count, liver and kidney function and electrolytes, tumor markers, routine urine and stool and fecal occult blood) and electrocardiogram examination;
- Imaging: chest CT, abdominal CT or MRI, pelvic CT or MRI;
- Keep a record of prescribed and over-the-counter medications (including start/drop dates, dosage, and indications) associated with the disease and use;
- Submission of tumor tissue specimens or unstained biopsy sections (10-15 slides), anticoagulated whole blood (5ml), and clotted blood (3ml) is required
- Quality of life questionnaire;
- Pregnancy tests.

**9.1.2 Treatment Visits**

- Recording and grading of adverse reactions, and determination of their relationship to the study drug;
- Recording of concomitant medications;
- Observation and recording of surgical complications for surgical patients: anastomotic leak, haemorrhage, stenosis, etc.

**9.1.3 End-of-Treatment Visit (EOT)**

If the patient discontinues treatment, the following assessments should be completed within 14 days (+/- 7 days) from the end of study treatment:

- Patients should complete the EORTC QLQ-C30 questionnaire at the beginning of the visit and before undergoing other study-related procedures.
- Complete physical examination, including a re-examination of all organ systems, examination of relevant organ systems, measurement of vital signs (heart rate, blood pressure, and body temperature) and weight.
- ECOG performance status score.
- Hematology (full blood count), a full panel of blood chemistry tests (liver and kidney function and electrolytes)
- Recording of toxic reactions and adverse events (AEs) using CTCAE version 5 (including onset/end date, severity, CTCAE term and grade, causality with study drug, outcome, and measures taken).
- Recording of all concomitant prescription and non-prescription medications (including start/stop date, dosage, and indication).
- If the patient discontinues treatment for reasons other than PD, all measurable neoplasms should continue to be measured and evaluated according to RECIST version 1.1.

**9.1.4 Safety Follow-up Visit**

A visit will be conducted 30 days (+7 days) after the patient permanently discontinues study treatment to assess clinical symptoms and AEs. All AEs occurring within 30 days of the last dose of study drug should be recorded. This visit can be conducted by telephone. The following assessments should be completed:

- Concomitant drug therapy (including anti-neoplasm drug therapy)
- Recording of toxic reactions and AEs

**9.1.5 Survival Follow-up**

Patient survival will be followed up every 3 months after the end of treatment.

**9.2 Efficacy Evaluation**

Tumor efficacy will be evaluated every 3 treatment cycles. Patients with observed disease remission confirmed by medical and surgical experts to be eligible for surgery during conversion therapy will undergo surgical treatment, and continue to receive immunotherapy in combination with chemotherapy after surgery. Patients who fail the conversion therapy will be treated according to the principles of palliative care and will continue treatment until PD or intolerable toxicity.

Efficacy evaluation will be conducted based on R0 resection rate, pCR, ORR, PFS, and OS until PD or intolerable adverse reactions. The study protocol will then end, and each visit and follow-up period will be evaluated until PD and OS. Tumor regression will be graded according to the Becker criteria [19], and efficacy evaluation will be performed using RECIST 1.1 [20].

**9.3 Safety Assessment**

The NCI-CTCAE version 5.0 will be used to evaluate the clinical safety of the study treatment. The occurrence of AEs will be assessed at each clinical visit.

Adverse Events (AEs）

Subjects (or the subject's legal representative, if applicable) should report AEs during the study.

Investigators should collect, follow up, and report AEs according to the prescribed procedures. More details on AE reporting can be found in Section 14.

Any clinical abnormalities that are still present at the end of the study will require continued follow-up until resolution or clinical stability is achieved.

1. **Adverse Reactions and Dose Adjustments**

**10.1 Nab-POF regimen dose adjustment**

- Toxicity reactions in patients should be closely monitored, and drug doses should be adjusted based on the most severe toxicity reactions that occurred in the previous treatment cycle.
- To allow recovery from treatment-related toxicity, the treatment is allowed to be delayed for up to 2 weeks. If the subject has not recovered after a 2-week delay, the subject is given termination of treatment.
- Patients who need more than two dose adjustments should discontinue the trial.
- Dose adjustment is required when the following hematological toxicity occurs: Grade 4 leukopenia or neutropenia, Grade 3 neutropenia with fever, or Grade 3/4 thrombocytopenia. The first dose adjustment for chemotherapy drugs (Nab-paclitaxol, oxalipatin, and 5-Fu) should be to 75% of the original dose, and the second adjustment to 50% of the original dose; if more than two adjustments are needed, discontinue the trial details see table below).
- Grade 3/4 non-hematological toxicity (excluding alopecia, neurotoxicity, and diarrhea) occurs. If the investigator determines that the toxicity is related to only one drug, there is no need to adjust the dosage of other drugs; instead, reduce the relevant drug by 25% for the next treatment cycle. If these toxicities still occur after the first dose reduction, the relevant drug can be reduced by another 25% for a second time.
- In the event of any special circumstances not covered above, the investigator shall decide on dose adjustment.

| CTCAE toxicity classification | Next cycle chemotherapy dose level | The next cycle begins |
| --- | --- | --- |
| Neutropenia | | |
| I | Maintain the original dose level | At the start of the chemotherapy cycle, if the neutrophil count is less than 1.5×10⁹/L, the administration of the drug should be suspended. If the chemotherapy is postponed for more than 2 weeks, the trial should be terminated |
| II | Maintain the original dose level |
| III | Maintain the original dose level |
| IV | if more than 5 days, reduce the dose by one level |
| Neutropenia with fever | Reduce the dose level |
| Thrombocytopenia | | |
| I | Maintain the original dose level | At the start of the chemotherapy cycle, if the platelet count is less than 75×10⁹/L, the administration of the drug should be suspended. If the chemotherapy is postponed for more than 2 weeks, the trial should be terminated |
| II | Maintain the original dose level |
| III | Reduce the dose level |
| IV | Reduce the dose level |
| Non-hematological toxicity | | |
| I | Maintain the original dose level | At the start of the chemotherapy cycle, if non-hematological toxicity is grade II or above, the administration of the drug should be suspended. If the chemotherapy is postponed for more than 2 weeks, the trial should be terminated |
| II | Maintain the original dose level |
| III | Reduce the dose level |
| IV | Reduce the dose level |

**10.2 PD-1 Dose Adjustments (Refer to the Package Insert of Camrelizumab)**

Dose reduction of PD-1 is not allowed; however, interruption or discontinuation of PD-1 treatment due to toxicity is allowed. Corticosteroids should be tapered after the AE has recovered to Grade 1 or lower, which should be continued gradually for at least 4 weeks. For PD-1 monoclonal antibodies that have been temporarily discontinued, they can be resumed after the AE has recovered to Grade 1 or 0 and corticosteroids have been gradually tapered. If the AE does not resolve within 12 weeks after the last dose or corticosteroids cannot be reduced to <=10 mg of prednisone or equivalent daily medication within 12 weeks, PD-1 should be permanently discontinued. For severe and life-threatening immune-related AEs (irAEs), intravenous corticosteroids should be administered first, followed by oral administration. If corticosteroids cannot control the irAEs, other immunosuppressive therapies should be initiated.

**11. Accompanying treatment**

Treatment for nausea

According to the guidelines, antihistamines, cimetidine, antiemetics and other pretreatment and appropriate non-steroidal treatment are recommended.

Treatment for diarrhea

Patients can be given anti-diarrheal and fluid replacement support treatment.

Treatment of allergic reactions

If anaphylaxis occurs during the infusion of oxaliplatin, symptomatic treatment should be given immediately according to conventional treatment experience.

Treatment with colony-stimulating factors

Granulocyte colony-stimulating factor (G-CSF) is not used prophylactically, but can be used when grade II bone marrow suppression occurs.

Treatment of neutropenic fever

If the patient has neutropenia fever, with or without diarrhea, he/she should be hospitalized for symptomatic treatment such as antibiotics and leukocyte elevation, and electrolyte monitoring should be paid attention to.

Other basic disease treatments, such as no liver enzyme or drug interaction, are treated according to the original basic treatment. If there is or is suspected to be liver enzyme or drug interaction, the treatment is discussed by the researchers.

Drugs that are prohibited or used with caution during the study period

Subjects were not allowed to receive any other investigational or anti-tumor drugs, including chemotherapy, immunotherapy, biological response modifiers (BRMs), or endocrine therapy.

**12. Participants complete/exited early**

**12.1 Completion**

If the subject continues according to the protocol until disease progression or an intolerable adverse reaction occurs, the study protocol will be terminated, and the subject will be considered to have completed the case if follow-up is later until disease progression or death and all evaluations are completed.

12.2 Early termination of treatment / withdrawal

The subject or his/her legal guardian may voluntarily withdraw from the study at any time during the study without any harm to their subsequent treatment. The investigator should ask the subject who withdrew from the study about the reason for withdrawal and whether there are any adverse events.

If possible, the investigator should follow up and evaluate all subjects who withdrew from the study, including those who withdrew due to serious adverse events. When the study was terminated, the last endpoint assessment should be performed on the subjects except for those who were lost to follow-up.

If any of the following conditions occur, the subject should voluntarily terminate the study:

- Women who are pregnant or planning to become pregnant;
- Poor compliance, failure to complete treatment or switch to other chemotherapy during the study;
- Serious adverse events or serious adverse reactions (SAE) occurred during the study;
- Any reason for a two-week delay in treatment (referring to all drugs in the medication regimen);
- Progressing disease (PD);
- Patients with missing main indicators and obviously incomplete research data.

If the following conditions occur and the follow-up of the subject cannot be continued, the subject will withdraw from the study:

- Disappearance;
- Withdraw the informed consent;
- Patients with poor compliance;
- Other reasons.

When a subject withdraws from the study before completion, the reason for withdrawal should be recorded in the CRF and original records.

1. **Statistical Analysis**

**13.1 Study population**

The study population includes the safety population and the efficacy population. The definition of the safety population and the efficacy population is as follows.

Safety population: The safety population will include all patients who have received at least one dose of the study drug. This population will be the primary population for safety and study treatment assessment.

Full Analysis Set (FAS) of Efficacy: This population will include all eligible patients who have completed at least one course of study drug and have had an assessment of tumor remission. This population will be the primary population for efficacy and baseline characteristics.

**13.2 Statistical methods**

Descriptive statistics will be used to analyze all data, including demographics, baseline, each efficacy evaluation indicator, and all safety data. For measurement data, the mean, standard deviation, number of responding subjects, median, maximum and minimum values will be described, and the 95% confidence interval (CI) of the mean will be calculated; for enumeration data, the frequency and percentage will be described, and the 95% CI of the percentage will be calculated.

According to the Flot3 study, which used the FLOT regimen for conversion therapy and achieved an R0 surgical resection rate of 48% (29/60), we will adopt the Nab-POF regimen in combination with immunotherapy in the present study, and aim to increase the R0 resection rate to 70%. Based on the rate comparison of PASS software, with a power of 0.8 and a significance level of 0.05 in a two-sided test, we will need a sample size of 39 cases, and assuming a dropout rate of 10%, we will need a sample size of 43 cases. Since the FLOT3 study did not specify the HER2 positive or negative status of the enrolled patients, we will ensure that 43 patients with HER2-negative status are enrolled, with no limit on the number of HER2-positive patients.

1. **Adverse event (AE) reporting**

Timely, accurate and complete reporting and analysis of safety information from clinical studies are crucial for the protection of subjects and sponsors, and are also mandatory requirements of global regulatory authorities. Fudan University Shanghai Cancer Center has established standard operating procedures (SOPs) in accordance with global regulatory norms to ensure the appropriate reporting of safety information. Integrating the SOPs of Fudan University Shanghai Cancer Center and the regulatory requirements of China, Fudan University Shanghai Cancer Center has specifically formulated this reporting procedure.

**14.1 Definition**

**14.1.1 Definition and classification of AEs**

**AEs**

According to the ICH GCP guidelines, an adverse event is any untoward medical occurrence in a subject administered a pharmaceutical product and does not necessarily have a causal relationship with this treatment.An adverse event can be any adverse and unwanted sign (including abnormal laboratory findings), symptom, or transient disease state during the use of the drug (including the investigational drug), regardless of whether it is related to the drug.

This includes any new events or those that have worsened in severity and frequency compared to baseline conditions, including abnormal results from diagnostic methods such as laboratory tests.

**Serious AEs (SAEs)**

Any undesirable adverse event occurring at any dose of the drug and meeting any one of the following criteria shall be considered a serious adverse event:

- Causing death;
- Life-threatening (the subject was at risk of death at the time of the event, excluding events that could theoretically lead to death in more severe cases);
- Resulting in hospitalization or prolonged hospital stay;
- Causing permanent or significant disability/function loss;
- Causing congenital malformations;
- Important medical events.

Note: Important Medical Events: Some medical events, although not meeting the criteria for a SAE, do not immediately endanger life, cause death, or hospitalization, but may harm the subject or require treatment intervention to prevent such outcomes. These situations, which researchers determine could lead to serious clinical consequences, are referred to as important medical events. The determination of important medical events is based on the researchers medical knowledge and clinical experience. The rapid reporting procedure for SAEs must also be followed for important medical events. Additionally, the suspected transmission of pathogens through the investigational drug is also considered an important medical event.

**Unanticipated (not listed) AEs**

Unanticipated adverse events are adverse events that are inconsistent with the nature and severity of drug safety information references. For marketed reference drugs, the expected judgment is based on the approved local instructions. This regimen chemotherapy is a routine standard regimen and should be referred to the drug instructions.

**14.1.2 Causality Assessment**

According to the following criteria, if the relationship between the drug and the adverse event is judged as: possibly related (possible), likely related (probable) or related (very likely), then the adverse event is considered to be related to the use of the drug.

**Definition of causality**

The causal relationship between the study drug and AEs was determined according to the following criteria.

- Irrelevant (not related): the AE is not related to the study drug;
- Probably not relevant (doubtful): the AE is more likely to be explained by other factors;
- May be related (possible): The AE may be related to the investigational drug and other explanations are not convincing;
- Most likely relevant (probable): The AE is likely to be related to the study drug, and the correlation suggests a possible time relationship, with little possibility of other explanations;
- Relevant (very likely): The AE has been listed as a possible adverse reaction and there is no reason to use other explanations.

**14.1.3 Criteria for judging severity**

The severity evaluation is based on general principles:

- Mild: mild symptoms and reactions, easy to tolerate, do not interfere with daily activities;
- Moderate: discomfort affects normal activity;
- Severe: significant impairment or loss of function caused by adverse reactions; or inability to perform normal daily activities;

Researchers should judge the severity of adverse events based on their own clinical experience, rather than directly based on the subjects subjective feelings and laboratory values.

**14.2 AE reporting**

**14.2.1 All AEs**

All adverse events, regardless of their severity, are collected after signing the informed consent and must be reported until 30 days after the last study medication.

For events that meet the criteria for SAEs, they should be reported according to the procedures for SAEs. All AEs, regardless of their severity or causal relationship with the study treatment, require researchers to take necessary measures to ensure the safety of participants and document them in medical terms on the original case report form and CRF. If symptoms or signs can be attributed to a common cause, the diagnosis of the disease should be provided as much as possible (for example, coughing, runny nose, sneezing, and sore throat should be reported as "upper respiratory infection"). Researchers must assess the causal relationship between AEs and the study drug and record it on the CRF. All actions taken in response to AEs should be documented in the original case report form and reported as required.

**14.2.2 SAEs**

All SAEs in clinical studies should be reported to the Ethics Committee of Shanghai Fudan University Affiliated Cancer Hospital within 24 hours after researchers are aware of them.

The content of SAEs should be filled out in the SAE report form, which must be signed by the research physician; and the project leader should be notified simultaneously. If the researcher is unable to fill out or fax the SAE report form during the first report of a SAE, they can report by phone, but the research physician must complete and fax the SAE report form to the Ethics Committee of Shanghai Fudan University Affiliated Cancer Hospital within 1 working day after the phone report.

All serious adverse events must be followed up until:

- The incident was mitigated
- The incident was stable
- If the baseline value is known, the event returns to the baseline value.
- The event could be attributed to other drugs or factors unrelated to the study.
- It is unlikely that any more information will be available (the subject or the physician refuses to provide additional information, and the subject is still lost after various follow-up attempts)

Subject deaths in clinical trials, whether anticipated or part of the study, will be considered

SAEs. Some events that require hospitalization or prolonged hospital stay may not be reported as SAEs. The situation is as follows:

- Admitted to hospital for social reasons rather than adverse events
- Admission for a pre-specified surgery or other treatment or examination (must be documented in the CRF)

If the research has special requirements (such as those from an ethics committee), reporting responsibilities must be fulfilled; however, this study protocol report requirement must be met.

**14.2.3 Pregnancy**

If the investigator finds that a subject is pregnant during the study, the investigator should fill in within 24 hours of learning and write the pregnancy report form and submit it to the Ethics Committee of Shanghai Fudan University Cancer Center (64175590-88503), and notify the project leader by phone (64175590-68183). Abnormal pregnancy results are considered as SAEs, and they will be reported according to the reporting procedures for SAEs.

**14.3 Safety issues**

Contact your oncologist if you encounter safety issues related to chemotherapy drugs in your study.

1. **Ethics**

**15.1 Responsibilities of researchers**

Researchers are responsible for ensuring that clinical studies are conducted in accordance with the protocol, current ICH-GCP and relevant regulations of the National Medical Products Administration (NMPA).

ICH-GCP is an internationally recognized standard for the ethical and scientific quality of research involving human subjects, covering design, implementation, documentation, and reporting. Research that adheres to this standard is considered to protect the rights, safety, and welfare of participants in accordance with the principles outlined in the Helsinki Declaration, and is reliable in terms of data quality.

**15.2 Independent Ethics Committee (IEC)**

Before the study is initiated, the investigator must provide the following documents to IEC:

- Final version of the trial protocol (and supplements);
- Informed consent form agreed by the sponsor and other written information provided to the subject (e.g., study participation card and subject diary card);
- Drug instructions;
- Materials to assist in the selection of subjects;
- Information on compensation for relevant trial-related injury or remuneration for the subjects participation in the trial;
- Researchers resume or equivalent information (unless IEC has a documented requirement not to provide);
- Information on the sponsors name, research funding, potential conflicts of interest, and information that influences the motivation of participants to participate in the trial;

**15.3 Informed consent**

Each subject (or their legal representative) must provide written consent after fully understanding the purpose and content of the study. This written consent must be signed (with signature and date) before any trial-related procedures are carried out. The informed consent form must be approved by the IEC. The informed consent form should comply with the Helsinki Declaration, current GCP guidelines, and relevant regulations.

Before potential participants are enrolled, researchers or their authorized personnel should explain to them the purpose of the study, its methods, possible benefits, potential risks, and any discomfort that may arise. Participants should be informed that their participation is voluntary and they can withdraw at any time. Whether or not they choose to participate will have no impact on the treatment of their condition. If a participant refuses to take part in the study, they still have the option to receive other treatments, and this refusal will not affect their future treatment plans. Finally, participants should understand that researchers will retain their identity records for long-term follow-up if needed, which may be reviewed by regulatory authorities within the scope allowed by relevant laws and regulations. Participants privacy will be protected. By signing the informed consent form, participants authorize these actions.

The subject (or their legal representative) should have sufficient time to read the informed consent form and ask questions. After the researchers explanation and before the subject is enrolled, the subject (or their legal representative) should sign their name and date on the informed consent form for record-keeping. After signing the informed consent form, the subject should receive a copy of it.

If the subject (or his/her legal representative) is unable to read and write, there should be a fair witness involved in the whole process of informed consent (including reading and explaining all written information), and personally sign his/her name and date after oral consent by the subject (or his/her legal representative).

Subjects who do not understand the content of informed consent can only participate in the trial after their legal representative has been informed.

If it is impossible to obtain the subjects prior consent and their legal representative is not present at the time, the procedure for including such subjects should be clearly described in the protocol. The IECs opinion on consent and any recommendations aimed at protecting the subjects rights and health must also be documented. Additionally, the legal representative of the subject should be notified as soon as possible and their consent obtained.

**12.4 Confidentiality of personal data**

This study only collects and processes data from subjects that are essential for the study of drug efficacy, safety, quality, and application.

The confidentiality of the data will be fully ensured during collection and use, and relevant laws and regulations protecting the privacy of subjects will be complied with.

The researchers will ensure that:

- The process of collecting data is fair and legal;
- The purpose for which the data is collected is specific, clear and lawful; and that no further processing of such data in a manner inconsistent with those purposes would be made contrary to those purposes;
- The data collected are sufficient, relevant and not excessive relative to the purpose of the study; data irrelevant to the purpose of the study are not collected;
- The data collected are accurate and should be updated when necessary to reflect the latest information.

Prior to the collection of personal data, the subject is asked for consent which should include an emphasis on the possibility that the data may be transferred to other institutional entities and countries.

Participants have the right to obtain their personal data from researchers and can request corrections or amendments to incorrect or incomplete data. Such requests should be properly addressed, taking into account their content and purpose, the status of the trial, and relevant laws. The nature of the request, the status of the trial, and related legal regulations must be considered.

Appropriate technical steps and management measures must be taken to organize procedures to protect the personal information of subjects from unauthorized access and disclosure, accidental and illegal destruction, as well as accidental loss and alteration. During the entire study period, co-organizers authorized to view the subjects personal data will keep it confidential.

1. **Reference**
2. Van Cutsem E, Sagaert X, Topal B,etc.Gastric cancer[J].Lancet,2016,388(10060):2654-2664.
3. Yamaguchi K, Yoshida K, Tanahashi T,etc.The long-term survival of stage IV gastric cancer patients with conversion therapy.[J].Gastric Cancer. 2018 Mar;21(2):315-323,2018,21(2):315-323.
4. Sato Y, Ohnuma H, Nobuoka T,etc.Conversion therapy for inoperable advanced gastric cancer patients by docetaxel, cisplatin, and S-1 (DCS) chemotherapy: a multi-institutional retrospective study[J].Gastric Cancer,2017,20(3):517-526.
5. Yoshida K, Yamaguchi K, Okumura N,etc.Is conversion therapy possible in stage IV gastric cancer: the proposal of new biological categories of classification[J].Gastric Cancer,2016,19(2):329-338.
6. Van Cutsem E, Sagaert X, Topal B,etc.Gastric cancer[J].Send to Lancet,2016,388(10060):2654-2664.
7. Mahoney KM, Freeman GJ, McDermott DF..The Next Immune-Checkpoint Inhibitors: PD-1/PD-L1 Blockade in Melanoma.[J].Clin Ther,2015,37(4):764-782.
8. Topalian SL, Taube JM, Anders RA,etc.Mechanism-driven biomarkers to guide immune checkpoint blockade in cancer therapy.[J].Nat Rev Cancer,2016,16(5):275-287.
9. Kang YK, Boku N, Satoh T,etc.Nivolumab in patients with advanced gastric or gastro-oesophageal junction cancer refractory to, or intolerant of, at least two previous chemotherapy regimens (ONO-4538-12, ATTRACTION-2): a randomised, double-blind, placebo-controlled, phase 3 trial[J].Lancet.,2017,390(10111):2461-2471.
10. Fuchs CS, Doi T, Jang RW,etc.Safety and Efficacy of Pembrolizumab Monotherapy in Patients With Previously Treated Advanced Gastric and Gastroesophageal Junction Cancer Phase 2 Clinical KEYNOTE-059 Trial[J].JAMA Oncol. 2018 May 10;4(5):e180013.,2018,4(5):e180013.
11. Bang YJ, Kang YK, Catenacci DV,etc.Pembrolizumab alone or in combination with chemotherapy as firstline therapy for patients with advanced gastric or gastroesophageal junction adenocarcinoma: results from the phase II nonrandomized KEYNOTE-059 study[J].Gastric Cancer,2019,22(4):828-837.
12. Schmid P, Adams S, Rugo HS,etc.Atezolizumab and Nab-Paclitaxel in Advanced Triple-Negative Breast Cancer.[J].N Engl J Med,2018,379(22):2018-2121.
13. Paz-Ares L, Luft A, Vicente D,etc.Pembrolizumab plus Chemotherapy for Squamous Non-Small-Cell Lung Cancer[J].N Engl J Med,2018,379(21):2040-2051.
14. Al-Batran SE1, Homann N2, Pauligk C1,etc.Effect of Neoadjuvant Chemotherapy Followed by Surgical Resection on Survival in Patients With Limited Metastatic Gastric or Gastroesophageal Junction Cancer: The AIO-FLOT3 Trial.[J].JAMA Oncol,2017,3(9):1237-1244.
15. Salah-Eddin Al-Batran, Ralf D Hofh einz, Claudia Pauligk,etc.Histopathological regression after neoadjuvant docetaxel, oxaliplatin, fluorouracil, and leucovorin versus epirubicin, cisplatin, and fl uorouracil or capecitabine in patients with resectable gastric or gastro-oesophageal junction adenocarcinoma (FLOT4-AIO): results from the phase 2 part of a multicentre, open-label, randomised phase 2/3 trial[J].Lancet Oncol,2016,17:1697-1708.
16. Al-Batran SE, Homann N, Pauligk C,etc.Perioperative chemotherapy with fluorouracil plus leucovorin, oxaliplatin, and docetaxel versus fluorouracil or capecitabine plus cisplatin and epirubicin for locally advanced, resectable gastric or gastro-oesophageal junction adenocarcinoma (FLOT4): a randomised, phase 2/3 trial.[J].Lancet,2019,393(10184):1948-1957.
17. Lorenzen S, Pauligk C, Homann N,etc.Feasibility of perioperative chemotherapy with infusional 5-FU, leucovorin, and oxaliplatin with (FLOT) or without (FLO) docetaxel in elderly patients with locally advanced esophagogastric cancer.[J].Br J Cancer,2013,108(3):519-526.
18. Al-Batran SE, Goetze TO, Mueller DW,etc.The RENAISSANCE (AIO-FLOT5) trial: effect of chemotherapy alone vs. chemotherapy followed by surgical resection on survival and quality of life in patients with limited-metastatic adenocarcinoma of the stomach or esophagogastric junction - a phase III trial of the German AIO/CAO-V/CAOGI.[J].BMC Cancer. 2017 Dec 28;17(1):893.,2017,17(1):893.
19. Shitara K, Takashima A, Fujitani K,etc.Nab-paclitaxel versus solvent-based paclitaxel in patients with previously treated advanced gastric cancer (ABSOLUTE): an open-label, randomised, non-inferiority, phase 3 trial.[J].Lancet Gastroenterol Hepatol,2017,2(4):277-287.
20. Becker K, Mueller JD, Schulmacher C,etc.Histomorphology and grading of regression in gastric carcinoma treated with neoadjuvant chemotherapy[J].Cancer,2003,98(7):1521-1530.
21. Eisenhauer EA, Therasse P, Bogaerts J,etc.New response evaluation criteria in solid tumours: revised RECIST guideline (version 1.1).[J].Eur J Cancer,2009,45(2):228-47.
