# Supplementary material
Source: Research Square preprint supplement (doi:10.21203/rs.3.rs-9880362/v1)
Supplement: Supplementary file 2 [file 5945af14c2362e0ffc6aef45.docx]

**Subject Informed Consent Form**

**Protocol No.: FDZL-PFG**

**Version No.: 3.1**

**Version Date: 2024.10.26**

**Protocol Title: Phase II Clinical Study of Camrelizumab, a PD-1 Antibody, in Combination with the Nab-POF Regimen as Conversion Therapy for Unresectable Locally Advanced or Limited Metastatic Gastric Cancer with a Single Metastatic Site: FDZL-GC001 Trial**

**Study Center Address: 270 Dong'an Road, Shanghai**

**Investigators at This Center: Weijian Guo / Dazhi Xu**

**Confidentiality Statement**

This document contains important confidential information that is proprietary to the study sponsor. It must not be disclosed unless required by applicable laws or regulations. This confidentiality requirement should be communicated to all persons who receive this material, and it also applies to all confidential documents that may be provided to you in the future.

| Please read the following carefully. We are inviting you to participate in a clinical study. Before you decide whether to participate, you need to understand why we are conducting this study and the related matters. If anything is unclear or if you would like more information, please feel free to ask questions. If you have any questions now or at any time during the study, we will answer them for you. |
| --- |

What is the name of the study?

Phase II Clinical Study of Camrelizumab, a PD-1 Antibody, in Combination with the Nab-POF Regimen as Conversion Therapy for Unresectable Locally Advanced or Limited Metastatic Gastric Cancer with a Single Metastatic Site: FDZL-GC001 Trial

What is the background of the study?

Gastric cancer is one of the common malignant tumors of the digestive tract. Most patients with gastric cancer are already at an advanced stage at diagnosis and cannot undergo radical surgery, which markedly reduces the chance of cure. Treatment therefore mainly relies on systemic therapy to prolong survival and improve quality of life. Although new chemotherapy drugs and molecular targeted therapies have improved the prognosis of unresectable gastric cancer, outcomes remain far inferior to those of patients with advanced gastric cancer who achieve R0 resection. It is therefore necessary to re-examine and adjust treatment strategies for advanced gastric cancer, especially effective conversion therapy for advanced gastric cancer with limited metastasis.

This clinical study enrolls patients with limited metastatic gastric cancer and uses the Nab-POF regimen (albumin-bound paclitaxel + oxaliplatin + fluorouracil, mFLOT) plus a domestic PD-1 antibody, with the aim of further improving pathological response and conversion resection rates in this type of gastric cancer.

What is the purpose of the study?

Primary objective: surgical R0 resection rate.

Secondary objectives:

1. Complete response rate: pathological complete response (pCR) + clinical complete response (cCR).
2. Pathological complete response (pCR).
3. Surgical resection rate.
4. Objective response rate (ORR).
5. Major pathological response (MPR).

(3) Disease control rate (DCR).

(4) Safety.

(5) Surgical complications: anastomotic leakage, bleeding, stenosis, etc.

(6) Progression-free survival (PFS).

(7) Overall survival (OS).

(8) Health-related quality of life.

(9) Exploratory analysis of PET-CT and other imaging examinations, tissue/blood biomarker testing, and their association with efficacy/prognosis.

How many people with a condition similar to yours (subjects) will participate in this study?

A total of 43 patients are planned to be enrolled in this study. The study will last for 2 years.

**If you voluntarily participate in this study, what study procedures will you need to complete?**

Your study doctor will examine you to determine whether you can participate in this study. This includes checking the inclusion/exclusion criteria, medical history, concomitant diseases, laboratory tests, and collecting tissue specimens before treatment.

Patients with previously untreated unresectable locally advanced or limited metastatic gastric cancer will be enrolled and will receive treatment with a domestic PD-1 antibody in combination with the mFLOT regimen. HER-2-positive patients will also receive trastuzumab. Tumor response will be assessed every 3 treatment cycles. After 6 cycles, medical and surgical experts will jointly assess resectability. Patients confirmed by surgery to be suitable for resection will undergo surgery within 3-6 weeks after completion of chemotherapy. After successful conversion, radical gastrectomy will be performed. Patients with liver metastases may undergo simultaneous or staged liver metastasis resection, radiofrequency ablation, or SBRT; patients with limited peritoneal metastasis or adrenal metastasis may undergo simultaneous resection; patients with ovarian metastasis may undergo simultaneous or staged surgery; patients with lung metastasis may undergo staged surgery, radiofrequency ablation, or SBRT; and patients with distant lymph node metastasis may receive postoperative radiotherapy to metastatic lymph nodes. Patients who recover well after surgery will continue immunotherapy plus chemotherapy after 3-6 weeks, with chemotherapy for up to 12 cycles and immunotherapy for up to 1 year. For patients who cannot tolerate three-drug chemotherapy after surgery, the investigator will decide whether to use a two-drug combination, single-agent 5-Fu/capecitabine/tegafur chemotherapy, or early termination. Patients assessed as having progressive disease (PD) at any evaluation will be considered to have failed conversion therapy and will withdraw from the study. If a patient has no progression after 6 cycles but has not met the resectability criteria, conversion therapy will continue for another 3 cycles, followed by reassessment of resectability. If resectable, surgery will be performed; if still unresectable, conversion will be considered unsuccessful and subsequent treatment will follow palliative care principles until disease progression or intolerable toxicity. During your treatment, your doctor will take measures to prevent or reduce complications and will treat unavoidable or already occurring complications promptly. However, if your complications do not allow you to continue treatment according to the regimen specified in this study, your doctor may ask you to withdraw from the study and continue conventional treatment.

During the study, if any new information about this study becomes available, your doctor will inform you and discuss with you whether you are willing to continue participating. If you decide to withdraw from the study during the course of the study, your doctor will make appropriate arrangements for your future treatment. You still have the right to choose other treatments, and your withdrawal will not affect your subsequent treatment.

**How will you receive treatment?**

If you decide to participate in the study, you will receive camrelizumab, a PD-1 antibody, in combination with the modified FLOT regimen as directed by the study staff for conversion therapy of unresectable locally advanced or limited metastatic gastric cancer with a single metastatic site. You may then receive corresponding surgery after assessment of surgical feasibility. After the study ends, your doctor will discuss your subsequent treatment options with you.

Although albumin-bound paclitaxel is used off-label, there is Phase III clinical trial evidence for its use in gastric cancer. It is safer than conventional paclitaxel

and has been routinely used in clinical practice at our hospital. You have the independent right to decide whether to continue participating in this study.

**What side effects may occur?**

Side effects of chemotherapy: adverse reactions may include gastrointestinal reactions such as nausea, vomiting, and diarrhea; bone marrow suppression; mucositis; hand-foot syndrome; neurotoxicity; and others.

Side effects of immunotherapy: reactive capillary hyperplasia and immune-related adverse reactions, including pneumonitis, diarrhea and colitis, hepatitis, nephritis, endocrine disorders, skin adverse reactions, thrombocytopenia, myocarditis, pancreatitis, encephalitis, and others.

The side effects and risks that may occur during the study include, but are not limited to, those listed above. Any investigational drug may cause other unforeseen or even serious side effects. The study doctor will closely monitor your condition to determine whether you have side effects and, when necessary, will use other medications to treat you in order to reduce side effects or discomfort.

Surgical complications: anastomotic leakage, bleeding, stenosis, etc.

**Others: bleeding, perforation, obstruction, and other events caused by disease progression.**

Your condition may further improve during the study, but it may also fail to improve or may worsen.

**What are the benefits of participating in the study?**

During your participation in this study, you will receive scientific guidance from the study doctor regarding your disease and close medical monitoring of your physical condition.

In addition, the information obtained from this study may help improve future treatment for other patients with tumors. We thank you for this.

**What do you need to do?**

If you participate in this study, you must:

- Provide detailed and accurate information about your past medical history and current treatment;
- Promptly inform the study doctor of any health problems that occur during the study;
- Obtain prior approval from the study doctor if you need to take any concomitant medication, including prescription drugs and over-the-counter medications purchased without a prescription, including vitamins and herbal medicines;
- Use chemotherapy as directed by your doctor, or receive combined surgical treatment as directed;
- Attend follow-up visits on time;
- Not participate in any other medical research.

**What should you do if you are harmed?**

If you experience study-related side effects or harm, please contact your study doctor promptly. Your doctor will determine the treatment and advice you need during and after the study. If you suffer harm as a result of participating in the study, you will receive compensation in accordance with Chinese laws and regulations. Subject insurance has been purchased for you. For injuries related to treatment with the study drug (camrelizumab), related medical expenses and financial compensation will be provided.

**Who will pay for the costs of this study?**

During the study, the immunotherapy drug will be the domestic PD-1 antibody camrelizumab for injection produced by Jiangsu Hengrui Medicine, which will be supplied free of charge for 12 administrations. Albumin-bound paclitaxel will be Aiyue from Jiangsu Hengrui. During conversion therapy, one treatment course will be provided free of charge and the patient may then independently decide whether to purchase two treatment courses, alternating in this manner. Other examination and treatment costs for patients who meet the inclusion and exclusion criteria will be borne by you or your medical insurance.

**How will the information collected about you be handled?**

The sponsor will use your scientific data for research and scientific analysis. This information will be kept in written form and stored on computers. To protect your privacy, personal information will be coded in a way that does not identify you personally. If the results of this study are publicly published, your personal identity will not be disclosed, and your data will be analyzed statistically together with data from other participants. By signing this consent form, you agree that we may use your study information.

Your personal medical records and the list linking your name to your code number will be retained by your study doctor for at least 5 years.

Drug regulatory authorities, members of the ethics committee/independent review board, study center staff, and representatives of the sponsor will be permitted to review this list and compare and verify the relevant information collected in the study against your medical records. Under the law, your medical records cannot be made public. By signing this consent form, you permit persons with legitimate reasons to review your medical records.

The collected scientific data may be submitted to the study sponsor, contracted partner companies, and drug regulatory authorities.

After consulting with your study doctor, you may review the information collected about you and may request correction of any errors. You may withdraw from the study at any time, but to the extent permitted by law, the sponsor will continue to use the information collected before your withdrawal.

**What if you change your mind?**

Your participation in this study is entirely voluntary. You are not required to participate in this study. You may agree to participate now and later change your mind. You may withdraw from the study at any time during the study. Your decision will not affect your routine treatment. It will not affect any care or education to which you are entitled.

Your study doctor has the right to terminate your participation in the study at any time during the study, with or without your consent. The study sponsor also has the right to instruct the study doctor to terminate your participation at any time during the study, with or without your consent. Such a decision may be made under the following circumstances:

- Terminating the study is a better medical choice for you.
- You do not follow medical instructions.
- The study is cancelled.

If you decide to withdraw from the study before completing it, you may be asked to visit your doctor for a final examination.

If you experience side effects caused by the study treatment after the study ends, please inform your study doctor; your doctor may add this information to your study records.

**Who should you contact for more information?**

If you have any questions about the study, please contact:

Name: __________, Position: ________________, Telephone: ____________________

Name: __________, Position: ________________, Telephone: ____________________

If you have questions about your rights as a subject, please contact:

Name: Weijing Zhang, Position: Ethics Secretary, Telephone: 021-61475590-88503

**Summary Overview**

**1. Will you undergo surgical treatment?**

After 6 and 9 cycles of immune conversion chemotherapy in this study, medical and surgical experts will jointly assess resectability. Patients confirmed by surgery to be suitable for resection will undergo surgery within 3-6 weeks after completion of chemotherapy. Patients who recover well after surgery will continue immunotherapy plus chemotherapy after 3-6 weeks. Chemotherapy before and after surgery will be given for up to 12 cycles, and immunotherapy for up to 1 year.

**2. Will side effects occur during the study?**

Due to individual differences, you may experience different degrees of chemotherapy and immunotherapy side effects. Adverse reactions may include gastrointestinal reactions such as nausea, vomiting, and diarrhea; bone marrow suppression; mucositis; hand-foot syndrome; neurotoxicity; allergy; and others. Immune-related adverse reactions may include reactive capillary hyperplasia, pneumonitis, diarrhea and colitis, hepatitis, nephritis, endocrine disorders, skin adverse reactions, thrombocytopenia, myocarditis, pancreatitis, encephalitis, and others.

Surgical complications: anastomotic leakage, bleeding, stenosis, etc.

**3. How long will participation in the study last?**

You will participate in this study until disease progression or intolerable toxicity. You may join this study only if you are willing and able to complete it.

**4. Can you withdraw from the study?**

Yes. You may withdraw from the study at any time, and withdrawal will not result in any charge or penalty. If you withdraw from the study, you will be asked to return to the study center for a final medical examination to ensure your safety.

**5. Under what circumstances will the study team ask you to withdraw from the study?**

If any of the following occurs:

- Your disease progresses, or you cannot tolerate the study treatment.
- New information shows that the study treatment cannot provide the best benefit for you.
- You become pregnant.

If the study doctor believes that continuing to participate in this study would be harmful to you, he or she may stop your participation at any time without your consent. The ethics committee and drug regulatory authorities may also terminate your participation in the study at their discretion. If the study is stopped, you will be informed, and your study doctor will help arrange your subsequent treatment.

**If you agree to participate in the study, please read the following information and sign.**

This consent form contains all important information that may help you decide whether to participate in this study. If you still have questions, please ask the study doctor or study staff before signing the consent form.

**Consent to Participate in the Study**

- I have read this information.
- I can read and understand the language used above.
- The relevant content of the study has been explained to me.
- All my questions about the study, possible risks, side effects, and the use of chemotherapy and surgical treatment regimens have been answered to my satisfaction.
- Based on the above information, I voluntarily agree to participate in this study.

You will receive a copy of the signed Subject Informed Consent Form.

| Subject Name (print) | Subject's Signature | Date |
| --- | --- | --- |
|  |  | |__|__|__|__|Year |__|__|Month |__|__|Day |
| Investigator Name (print) | Investigator's Signature | Date |
|  |  | |__|__|__|__|Year |__|__|Month |__|__|Day |

(Note: If the subject lacks capacity, the legal representative must sign.)
