# Supplementary material
Source: Research Square preprint supplement (doi:10.21203/rs.3.rs-9880362/v1)
Supplement: Supplementary file 3 [file ed3092e36c33ddfd1bcd11aa.docx]

**Methods**

**Exosome isolation, RNA extraction and RNA-Seq Analysis**

Five milliliters of peripheral blood was collected from patients 1-3 days before treatment initiation, from which plasma was separated and stored in a -80 degree Celsius freezer. Exosomes isolation, RNA extraction and RNA-seq analysis were performed using a method adapted from [Yanan Yang, 2023]1.

**RNA Extraction from Tissue Sections and RNA sequencing**
In this experiment, the RNAstorm™ Kit for Isolation of RNA from formalin-fixed, paraffin-embedded (FFPE) Tissue Samples (CD501) from BIOTUM was used. The paraffin tissue was carefully scraped from the paraffin section using a surgical blade and placed in a 1.5 mL centrifuge tube. The paraffin is removed from the sections. The tissue is treated to release RNA from other cellular components and to remove formaldehyde-induced modiﬁcations. Contaminating genomic DNA is degraded using DNase I. Cellular debris and other impurities are removed from the RNA. The RNA is first bound to a spin column in the presence of Binding Buffer, then washed using Wash Buffer. Pure RNA is ﬁnally eluted using water.

RNA sequencing libraries were constructed using 1 μg ribosomal RNA-depleted total RNA (Ribo-off rRNA Depletion Kit, Vazyme), with subsequent steps employing the VAHTS Total RNA-seq (H/M/R) Library Prep Kit (Vazyme) per manufacturer protocols. Briefly, depleted RNA (~100 ng) underwent alkaline fragmentation followed by double-stranded cDNA synthesis via random hexamer priming. cDNA ends were repaired using a dedicated DNA End Repair Kit, with subsequent 12-cycle PCR amplification of size-selected fragments. Final libraries were sequenced on the Illumina platform (150 bp paired-end). Raw reads were aligned to GRCh38 reference genome using HISAT2 (v2.2.1) with default splice-aware parameters. Technical batch effects were mitigated via combat-seq (v1.8.0). Transcript quantification employed TPM normalization, with gene annotations derived from GENCODE release 25.

We analyzed an immune-related gene set using FPKM-normalized expression values. For each gene, expression distributions in the two groups were compared and visualized with boxplots; associated p-values were annotated on the figures. Data visualization and statistical analyses were performed in R using the ggplot2 and ggpubr packages.

**Immunohistochemistry (IHC)**

We used FFPE tissue sections to perform IHC staining, which were incubated with primary antibodies against GZMB (1:3000) (Abcam, ab255598), CD8 (1:400) (Proteintech, #17335-1-AP), CD163 (1:500) (Abcam, #ab87099), Foxp3 (1:100) (Cell Signaling Technology,12853S) and PD-L1 22C3 (DAKO) overnight at 4 °C respectively. Then the paraffin sections were incubated with secondary antibody.

**LASSO-penalized Cox regression and risk-score construction**

For each endpoint (OS and PFS) we applied a LASSO (least absolute shrinkage and selection operator) penalized Cox proportional hazards model to the CIBERSORT-derived immune fractions to select prognostic features. Modeling was performed in R using the glmnet package with 10-fold cross-validation; the regularization parameter λ was chosen at the value minimizing the cross-validated partial likelihood deviance (λ_min). Models were fitted separately for OS and PFS. The final linear prognostic score for each patient was calculated by summing the product of the selected immune fraction values and their corresponding LASSO coefficients.The optimal cutoff for each riskscore was determined using the survminer package, and Kaplan–Meier survival curves were plotted to compare the resulting risk groups.

**Gut microbiome analysis**

Feces were collected from patients before the first cycle of treatment. Then 16S ribosomal RNA (rRNA) was used to detect intestinal flora in faece by Shanghai Majorbio Bio-pharm Technology Co., Ltd (Shanghai, China). 338F (5-ACTCCTACGGGAGGCAGCAG-3) and 806R (5-GGACTACHVGGGTWTCTAAT-3) were chose to amplify this region. First, the whole genome DNA was extracted and amplified; PCR products were quantified and pooled at equimolar amounts. In the end, the completed library was sequenced using an Illumina HiSeq system. Notably, sequencing reads optimized and operational taxonomic unit assigned to taxonomy were basic work before analysis of intestinal microbial community.

**Results**

**Exosome Predictive Model**

We collected exosomes from 35 patients with HER2 negative status. To identify lncRNAs and protein-coding RNAs significantly associated with PFS, we performed Lasso regression (Supplemental Figure 1A). This analysis identified three lncRNA (AC107959.1, AC097263.1, AL365295.1) and nine protein-coding RNAs (AR, FABP5, CHML, AFF2, TMEM126B, HEBP1, IGKV1-39, TM2D3, BTN3A2) as prognostic markers. Using these candidates, we developed a risk score model with the following formula:

Riskscore=-0.01151842*AR-0.003463459*FABP5+0.08782737*AC107959.1-0.0350731*CHML-0.04281272*AFF2-0.03628639*TMEM126B-0.008800316*AC097263.1-0.01811153*HEBP1-0.01412124*IGKV1-39+0.04964616* TM2D3+1.248555E-16*AL365295.1-0.007110822*BTN3A2

Risk scores were calculated for each sample, and the optimal cut-off value (0.100) was determined using the "Surv-cutpoint" function (Supplemental Figure 1B). Patients were classified into high-risk and low-risk groups based on this cut-off. Kaplan-Meier survival curves demonstrated that the high-risk group had significantly shorter PFS (P = 0.000, Supplemental Figure 1C) and OS (P = 0.000, Supplemental Figure 1D) compared to the low-risk group.

**Longitudinal IHC and Transcriptomic Profiling of Immune Cells**

We collected 18 pre-treatment and 13 post-treatment FFPE sections, which were obtained from gastroscope or surgical specimen. Immunohistochemistry staining (IHC) was performed for the following molecules and their corresponding cells: CD8 (CD8+ T cells), CD163 (M2 macrophage), Foxp3 (Treg) and Granzyme B(GZMB). We divided these patients into two groups based on whether the disease progressed or not with significant different survival (Supplemental Figure 2A-B). Among 18 pre-treatment FFPE sections, patients without disease progression had higher CD8 expression than those with disease progression (P = 0.032; Supplemental Figure 2C). Among the 13 post-treatment FFPE sections, patients without disease progression had higher GZMB expression than those with disease progression (P = 0.039; Supplemental Figure 2D), while there was no difference in the expression of CD8. Among the 13 patients, seven patients had [68Ga]Ga-NOTA-GSI PET/CT. IHC analysis demonstrated GZMB high expression in 2/3 cases (66.7%) with radiotracer-avid primary lesions, compared to 1/4 cases (25%) in the non-avid group. There was no difference in the expression of CD163 and Foxp3 between the two groups before and after treatment (Supplemental Figure 2E and 2F).

Pre- and post-treatment tumor tissue were evaluated PD-L1 expression by IHC. The proportion of CPS greater than 5 was 55.9% (19/34) at baseline and 30.8% (4/13) after treatment (P = 0.193). Analysis of 8 paired pre- and post-treatment specimens revealed that patients with reduced or stable CPS expression (n=5) showed 20% progression (1/5), whereas patients with elevated CPS (n=3) showed universal progression (3/3). Post-treatment CPS elevation emerged as a biomarker for poor clinical outcome.

RNA extraction and RNA sequencing were performed in 14 pre-treatment and 13 post-treatment FFPE sections. One FFPE section extracted RNA failed the quality control and thus cannot be sequenced. The relative infiltration fraction of 22 immune cells was calculated using CIBERSORT based on RNA-seq data. Pre-treatment analyses revealed patients without disease progression exhibited enhanced naïve B cells but reduced macrophage M2 than those with disease progression (Supplemental Figure 2G). Besides, pre-treatment analyses revealed there is a tendency that patients without disease progression exhibited enhanced CD8+ T cells, activated mast cells and reduced resting NK cells (Supplemental Figure 2G). It seems that patients without disease progression had better immune micro-environment. Post-treatment analyses revealed patients without disease progression showed enhanced plasma cells and a tendency of reduced M2 macrophages than those with disease progression (Supplemental Figure 2H). There was no difference in CD8+ T cells between the two groups, which is consistent with the IHC results (Supplemental Figure 2H).

Immune-related gene set analysis revealed that MSR1, CCL8, TGFBR2 and TNFSF11 were significantly downregulated in the patients without disease progression (P < 0.05; Supplemental Figure 2I). Moreover, comparison of expression pre- and post- treatment showed reduced expression of CXCL16, CCL24 and FASLG (P < 0.05; Supplemental Figure 2J). Expression of the immune checkpoint ligand PD-L1 (CD274) decreased, while PD-1 (PDCD1) elevated after treatment (P < 0.05; Supplemental Figure 2J).

**A predictive risk score based on immune features**

Using LASSO-selected features from CIBERSORT-derived immune fractions, we constructed two predictive risk scores for OS and PFS. Kaplan–Meier analysis showed a trend toward poorer OS in patients with high OS_riskscore (higher vs. lower risk groups; P = 0.035; Supplemental Figure 2K-M). Patients with high PFS_riskscore had significantly shorter PFS compared with those with low PFS_riskscore (higher vs. lower risk groups; P = 0.030; Supplemental Figure 2N-P). The subgroup with a "favorable" immune cell profile predicted by the model showed no recurrence, and the difference was significant. Collectively, these results suggest that an immunosuppressive and tumor-promoting microenvironment characterized by M2 macrophages, Tregs, and specific dendritic and mast cell states contributes to unfavorable clinical outcomes.

The OS risk score was defined as:

The PFS risk score was defined as:

**Gut Microbiota Profiling**

We performed 16S rRNA sequencing on feces from a total of 15 patients to compare the microbial communities between patients with disease progression or not. There were differences in β-diversity observed through principal co-ordinates analysis (PCoA) (Supplemental Figure 2Q). Colony composition analysis in the genus level revealed an increase in the abundance of ASV1108, ASV100 and a decrease in the abundance of ASV313, ASV695 in the patients with disease progression (Supplemental Figure 2R).

**Discussion**

Exosomes are a subset of extracellular vesicles secreted by eukaryotic cells, which contain a variety of RNAs. Our team has already adopted exosomal RNA sequencing to build a model1 previously, which has successfully predicted the effect of first-line chemotherapy for advanced colorectal cancer and has been verified. In this study, we performed Lasso regression and identified two lncRNA and two protein-coding RNAs as predictive markers. Using these indicators, we developed a risk score model and found that high-risk group had significantly shorter PFS and OS compared to the low-risk group. The new model showed its good predictive effect for prognosis, clearly separated the PFS and OS curves, significantly better than that of clinical predictive factors. The low-risk group has a high PFS and OS rate at 30 months. It is expected to be used to predict and screen the population that can benefit from conversion therapy in the future. For patients calculated as low risk by the model, the conversion therapy strategy is highly recommended, while for high-risk patients, caution is required. However, both the exosome sequencing model and the GSI PET/CT scan need further verification.

We did a comprehensive analysis of tumor immune microenvironment (TIME), transcriptome dynamics, and gut microbiota in relation to clinical outcomes. In the subgroup with favorable outcomes, a superior immune microenvironment was observed at baseline, characterized by higher proportions of CD8⁺ T cells, along with lower proportions of M2 macrophages, regulatory T cells (Tregs). However, in samples after chemoimmunotherapy, the abundance of CD8⁺ T cells was not associated with treatment efficacy, whereas high granzyme B expression was correlated with favorable outcomes, suggesting that activated T cells or NK cells contribute to improved long-term efficacy, which aligns with the correlation observed between GSI uptake and long-term outcomes.

This indicates that immunotherapy plays a significant role in the therapeutic effect. Detecting granzyme expression levels post-treatment may serve as a predictive biomarker for the efficacy of combined immunotherapy and chemotherapy. We observed significant differences in the expression of multiple immune-related genes between patients with good and poor therapeutic responses. For example, TGFBR2 and CXCL16 were significantly downregulated in the good-efficacy group (p < 0.05), suggesting these genes may contribute to tumor persistence when highly expressed. The lower expression of TGFBR2 in responders is consistent with reduced TGF-β–mediated immunosuppression in the tumor microenvironment, since TGF-β signaling is a recognized mechanism of tumor immune evasion2; thus, therapeutic inhibition of this pathway might relieve local immunosuppression and enhance anti-tumor immunity. Comparison of expression before and after treatment revealed that several genes were significantly downregulated following therapy (p < 0.05), indicating a treatment-associated suppression of these targets that may contribute to anti-tumor effects. The reduced expression of chemokines such as CXCL16 and CCL24 may reflect altered immune-cell recruitment and remodeling of the tumor microenvironment, with potential implications for tumor cell migration3. FASLG, which can mediate apoptosis of activated T cells when expressed by tumor cells, was also decreased after treatment; this reduction could diminish tumor-driven T-cell elimination and thereby support a stronger anti-tumor immune response. Expression of the immune checkpoint ligand PD-L1 decreased post-treatment, consistent with a less immunosuppressive microenvironment. Although upregulation of PD-1 is often interpreted as a marker of T-cell exhaustion, it can also result from T-cell activation following chemotherapy-induced antigen release; such PD-1 elevation may render tumors more amenable to subsequent PD-1/PD-L1 blockade4. A recent study5 has revealed that the chemotherapy alone generally reduces overall PD-L1 expression in breast cancer patients and upregulation of PD-L1 in residual cells following chemotherapy serves as a marker of drug resistance and may represent an underlying mechanism. Interestingly, our study found that the combination of chemotherapy and immunotherapy also led to an overall decrease in PD-L1 levels. Notably, elevated PD-L1 expression on residual cancer cells was again identified as a marker of resistance to the combined therapy, potentially contributing to the mechanism of treatment failure. Furthermore, a study6 in lung and gastric cancer has shown that high baseline levels of PD-L1 on circulating extracellular vesicles (EVs) are associated with resistance to immunotherapy. The mechanism involves tumor-secreted MFGE8, which promotes the enrichment of PD-L1 into tumor-derived EVs. These PD-L1 positive EVs subsequently inhibit T-cell function, leading to resistance against PD-1 antibody therapy. In contrast, our study observed that treatment-induced upregulation of PD-L1 is also correlated with therapy resistance; however, the underlying mechanism requires further investigation. Furthermore, our immune cell model can effectively predict PFS and helps identify patients who are likely to benefit. Patients with a "favorable" immune cell status derive significant clinical benefit and remain free of recurrence. These findings suggest that detecting immune cell profiles can aid in predicting treatment efficacy, key immune subsets could serve as therapeutic targets, and optimizing the immune microenvironment will help enhance treatment outcomes.

Our 16S rRNA sequencing analysis revealed distinct gut microbial profiles associated with disease progression. The significant differences in β-diversity indicate that disease status correlates with substantial shifts in overall microbial community structure. At the genus level, progression was characterized by increased abundance of ASV1108 and ASV100, alongside decreased levels of ASV313 and ASV695, suggesting these taxa may play functional roles in disease advancement. These findings support a role for gut microbiota in modulating disease outcomes, warranting further investigation in larger cohorts to validate these microbial signatures and explore their mechanistic contributions to disease progression.

**Supplemental Figure 1** **Exosome Prognostic Model.** (A) Lasso regression screened lncRNAs and protein-coding RNAs associated with PFS. (B) The optimal cut-off value for the risk score evaluated using the "Surv_cutpoint". (C) Kaplan-Meier curve showed that patients in the high-risk group had significantly shorter PFS than those in the low-risk group (*P* = 0.000). (D) Kaplan-Meier curve showed that patients in the high-risk group had significantly shorter OS than those in the low-risk group (*P* = 0.000).

**Supplemental Figure 2 Multi-dimensional profiling of survival disparities in disease progression: integrated analysis of immune microenvironment, transcriptome dynamics, and gut microbiome signature.** Survival difference between patients with or without disease progression in patients with baseline FFPE sections (A-B). Immunohistochemical images taken at 20X magnification, scale bar 50 µm, for (C) CD8, (D)GZMB, (E) CD163, (F)Foxp3. CIBERSORT analysis for immune cells difference in patients with disease progression or not pre-treatment (G) and post-treatment (H). Different expression genes between pre- and post- treatment (I-J). High-risk immune feature score and survival outcome (K-P). Principal co-ordinates analysis (PCoA) of fecal metagenomics sequencing from patients with or without disease progression at the ASV level (Q). Wilcoxon rank-sum test bar plot of fecal metagenomics sequencing from patients with or without disease progression at the ASV level (R).

1. Yang Y, Zhang J, Zhang W, et al. A liquid biopsy signature of circulating extracellular vesicles-derived RNAs predicts response to first line chemotherapy in patients with metastatic colorectal cancer. *Mol Cancer* 2023; **22**(1): 199.

2. Li S, Liu M, Do MH, et al. Cancer immunotherapy via targeted TGF-beta signalling blockade in T(H) cells. *Nature* 2020; **587**(7832): 121-5.

3. Argyris DG, Anastasiadou DP, Filippou PS, Karagiannis GS. An emerging paradigm of CXCL16 involvement in cancer progression. *Cytokine Growth Factor Rev* 2025; **84**: 87-100.

4. Ribas A, Hu-Lieskovan S. What does PD-L1 positive or negative mean? *J Exp Med* 2016; **213**(13): 2835-40.

5. Tamem NN, Mabrouk SH, Shehabeldin ZA, Gado NMA, Salman MI, Abd El Khalek SMM. Immunohistochemical Study on Programmed Death Ligand 1 (PD-L1) in Breast Carcinoma and Its Correlation With the Clinicopathological Parameters. *Appl Immunohistochem Mol Morphol* 2025; **33**(5): 321-9.

6. Wang W, Chen J, Wang S, et al. MFGE8 induces anti-PD-1 therapy resistance by promoting extracellular vesicle sorting of PD-L1. *Cell Rep Med* 2025; **6**(2): 101922.
